# Supplementary material for: JNK signaling regulates E-cadherin junctions in germline cysts and determines primordial follicle formation in mice
Source: Oxford University Press journal article supplement (doi:10.1242/dev.132175), 2016-01-01
Supplement: dev132175supp.pdf [file dev132175supp.pdf]

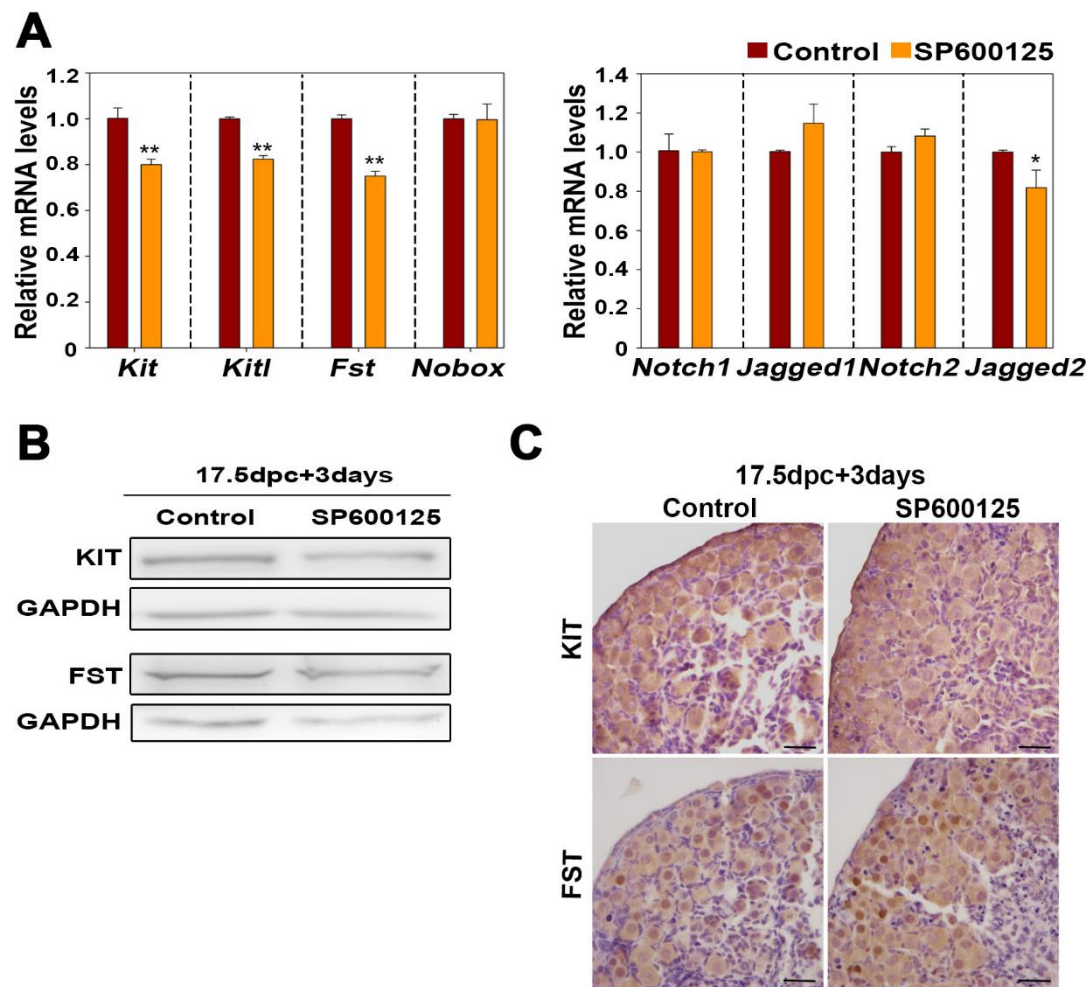

**Figure S1. JNK signaling inhibition does not affect KIT, FST protein expression.** 17.5 dpc ovaries were cultured with SP600125 for 3 days *in vitro*. **(A)** The mRNA levels of several primordial folliculogenesis related genes were detected using qRT-PCR. The expression of *Kit*, *Kitl*, *Fst*, and *Jagged2* were decreased following the SP600125 treatment, while the expression of *Nobox* and other *Notch* family genes exhibited mild alterations. Asterisk (\*) indicates a significant difference between control and treated ovaries. \* $P < 0.05$ , \*\* $P < 0.01$  (*t*-test), control versus treated ovaries. **(B)** Western blotting analyses indicated no remarkable change in KIT and FST protein expression following SP600125 treatment. **(C)** KIT and FST were both mainly expressed in oocytes and not affected by JNK inhibition after immunohistochemistry analyses. Scale bars: 25  $\mu$ m.

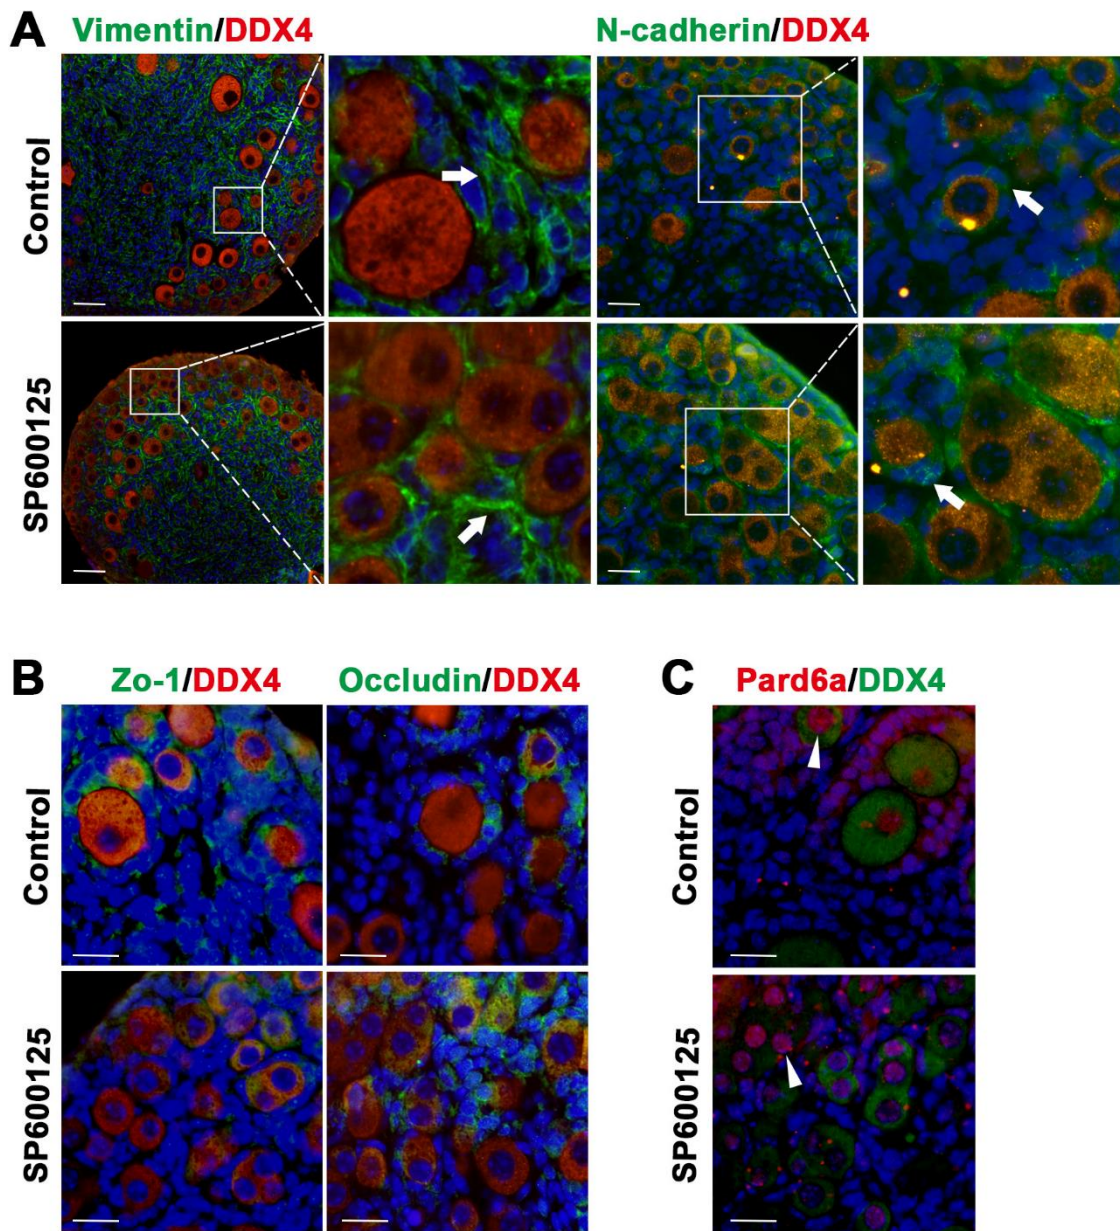

**Figure S2. JNK inhibition signaling does not affect other cell junction related factors.** 17.5 dpc ovaries were cultured with SP600125 for 6 days *in vitro* and immunofluorescence was performed to examine the expression of some cell junction related factors. Sections of ovary were stained with DDX4 antibody to identify oocytes. **(A)** N-cadherin (green) and Vimentin (green) were detected in pre-granulosa cells (arrows) and the SP600125 treatment had no impact on their localization and expression. **(B)** The tight junction protein Zo-1 (green) and Occludin (green) were hardly detected in fetal mouse ovaries. **(C)** The polarity protein Pard-6a (red) was strongly localized in oocytes (arrowheads), but was not affected by inhibition of JNK signaling. Scale bars: 25  $\mu$ m.

Table S1. Oligonucleotide primers used for shRNA lentivirus production

| Primers       | Primer sequence (5'.....3')                                     | Length (bp) |
|---------------|-----------------------------------------------------------------|-------------|
| JNK1-sh1-F    | TGGTGCATTATGGGAGAAATTCAAGAGAATTTCTCCC<br>ATAATGCACCTTTTTTC      | 55          |
| JNK1-sh1-R    | TCGAGAAAAAAGGTGCATTATGGGAGAAATTCTCTTGA<br>AATTTCTCCCATAATGCACCA | 59          |
| JNK1-sh2-F    | TGTCCTGAATTCATGAAGAATTCAAGAGATTCTTCATGA<br>ATTCAGGACTTTTTTC     | 55          |
| JNK1-sh2-R    | TCGAGAAAAAAGTCCTGAATTCATGAAGAATCTCTTGA<br>ATTCTTCATGAATTCAGGACA | 59          |
| JNK2-sh1-F    | TGGTGCATCATGGCAGAAATTCAAGAGAATTTCTGCC<br>ATGATGCACCTTTTTTC      | 55          |
| JNK2-sh1-R    | TCGAGAAAAAAGGTGCATCATGGCAGAAATTCTCTTGA<br>AATTTCTGCCATGATGCACCA | 59          |
| JNK2-sh2-F    | TGCCAACTGTAAGGAATTATTTCAAGAGAATAATTCCTT<br>ACAGTTGGCTTTTTTC     | 55          |
| JNK2-sh2-R    | TCGAGAAAAAAGCCAACTGTAAGGAATTATTCTCTTGA<br>AATAATTCCTTACAGTTGGCA | 59          |
| WNT4-sh-F     | TGAGAAACTCAAAGGCCTGATTCAAGAGATCAGGCCT<br>TTGAGTTTCTCTTTTTTC     | 55          |
| WNT4-sh-R     | TCGAGAAAAAAGAGAAACTCAAAGGCCTGATCTCTTG<br>AATCAGGCCTTTGAGTTTCTCA | 59          |
| Scramble-sh-F | TGAACTCAAGACCGATATTATTCAAGAGATAATATCGGT<br>CTTGAGTTCTTTTTTC     | 55          |
| Scramble-sh-R | TCGAGAAAAAAGAACTCAAGACCGATATTATCTCTTGA<br>ATAATATCGGTCTTGAGTTCA | 59          |

Table S2. Primary antibodies used in the immunodetection

| Antibody         | Catalog Code | Source                    | Host   | Dilution |       |
|------------------|--------------|---------------------------|--------|----------|-------|
|                  |              |                           |        | IF/IHC   | WB    |
| JNK              | Sc-1648      | Santa Cruz                | Mouse  | 1:100    | 1:500 |
| DDX4             | Ab27591      | Abcam                     | Mouse  |          | 1:200 |
| P-JNK            | Sc-135642    | Santa Cruz                | Rabbit |          | 1:500 |
| GAPDH            | AM4300       | Life Technologies         | Mouse  |          | 1:500 |
| C-Jun            | 9165         | Cell Signaling Technology | Rabbit |          | 1:500 |
| P-c-Jun (ser 63) | 9261s        | Cell Signaling Technology | Rabbit |          | 1:200 |
| E-cadherin       | Ab76055      | Abcam                     | Mouse  | 1:200    | 1:500 |
| N-cadherin       | Ab12221      | Abcam                     | Rabbit | 1:200    |       |
| $\beta$ -catenin | Sc-7199      | Santa Cruz                | Rabbit | 1:500    |       |
| WNT4             | Ab91226      | Abcam                     | Rabbit | 1:100    | 1:500 |
| MDM2             | Ab178938     | Abcam                     | Rabbit | 1:200    | 1:500 |
| FST              | Sc-30194     | Santa Cruz                | Rabbit | 1:200    | 1:200 |
| KIT              | Sc-168       | Santa Cruz                | Rabbit | 1:200    | 1:200 |

Table S3. Primers used in qRT-PCR

| Gene          | Forward (5'.....3')     | Reverse (5'.....3')    |
|---------------|-------------------------|------------------------|
| <i>Kit</i>    | GGCCTCACGAGTTCTATTTACG  | GGGGAGAGATTTCCCATCACAC |
| <i>Kitl</i>   | GAATCTCCGAAGAGGCCAGAA   | GCTGCAACAGGGGGTAACAT   |
| <i>Fst</i>    | TGCTGCTACTCTGCCAGTTC    | GTGCTGCAACACTCTTCCTTG  |
| <i>Nobox</i>  | AAGACCCGAACCCGTGTACC    | CTCATGGCGTTTGTCACTGTC  |
| <i>Notch1</i> | GATGGCCTCAATGGGTACAAG   | TCGTTGTTGTTGATGTCACAGT |
| <i>Jag1</i>   | CCTCGGGTCAGTTTGAGCTG    | CCTTGAGGCACACTTTGAAGTA |
| <i>Notch2</i> | ATGTGGACGAGTGTCTGTTGC   | GGAAGCATAGGCACAGTCATC  |
| <i>Jag2</i>   | CAATGACACCACTCCAGATGAG  | GGCCAAAGAAGTCGTTGCG    |
| <i>Wnt4</i>   | CGGGGAAGGCCGATAATTTAAAC | CAAGGGACCCAAAAACCAAACC |
| E-cadherin    | CAGCCTTCTTTTCGGAAGACT   | GGTAGACAGCTCCCTATGACTG |
| <i>Jnk1</i>   | ATGGCTGTCGATATTCAACCAG  | CCTCTTGGGCATACCCAC     |
| <i>Jnk2</i>   | GGGCTCCAGAAGTCATCCTG    | AACCTTTCACCAGCTCTCCC   |
